# Supplementary material for: Synthesis of a zwitterionic N-Ser–Ser-C dimethacrylate cross-linker and evaluation in polyampholyte hydrogels
Source: Royal Society of Chemistry journal article supplement (doi:10.1039/d1bm00603g), 2021-01-01
Supplement: d1bm00603g1.pdf [file d1bm00603g1.pdf]

Supporting Information for:

## Synthesis of a Zwitterionic *N*-Ser-Ser-*C* Dimethacrylate Cross-linker and Evaluation in Polyampholyte Hydrogels

Moubani Chakraborty<sup>†#</sup>, Stephanie L. Haag<sup>#</sup>, Matthew T. Bernards<sup>‡\*</sup>,  
and Kristopher V. Waynant<sup>†\*</sup>

<sup>†</sup>Department of Chemistry, University of Idaho, Moscow, ID 83844

<sup>‡</sup>Department of Chemical and Biological Engineering, University of Idaho, Moscow, ID 83844

<sup>#</sup>The first two authors contributed equally to this work

\*Corresponding authors: [kwaynant@uidaho.edu](mailto:kwaynant@uidaho.edu); [mbernards@uidaho.edu](mailto:mbernards@uidaho.edu)

### Table of Contents

- <sup>1</sup>H and <sup>13</sup>C NMR spectra of all reported compounds (Figures S1-S13) Pgs 2-8
- High Resolution Mass Spectrometry of Zwitterionic Cross-linker **1** (Fig S14) Pg 9

(5) *tert*-butyl (*tert*-butoxycarbonyl)-*L*-serinate

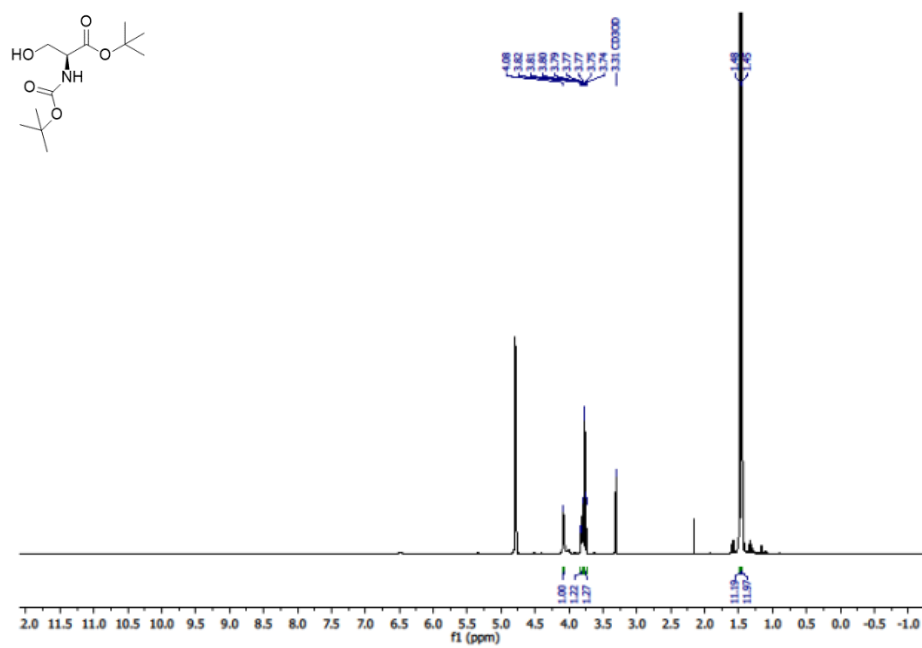

Figure S1: <sup>1</sup>H NMR of compound 5

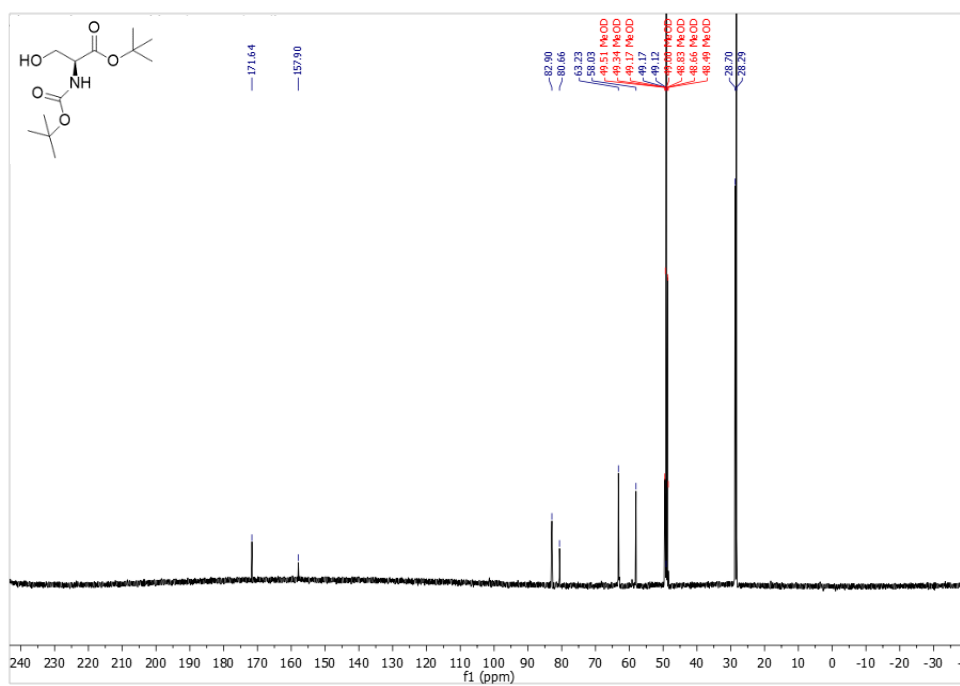

Figure S2: <sup>13</sup>C NMR of compound 5

(6) (*S*)-3-(*tert*-butoxy)-2-((*tert*-butoxycarbonyl)amino)-3-oxopropyl methacrylate

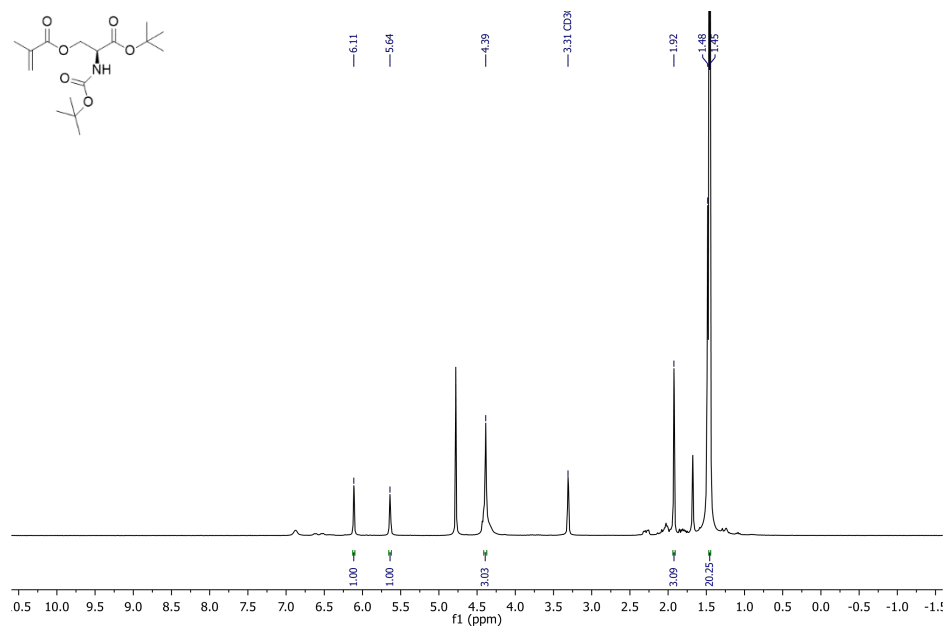

Figure S3: <sup>1</sup>H NMR of Compound 6

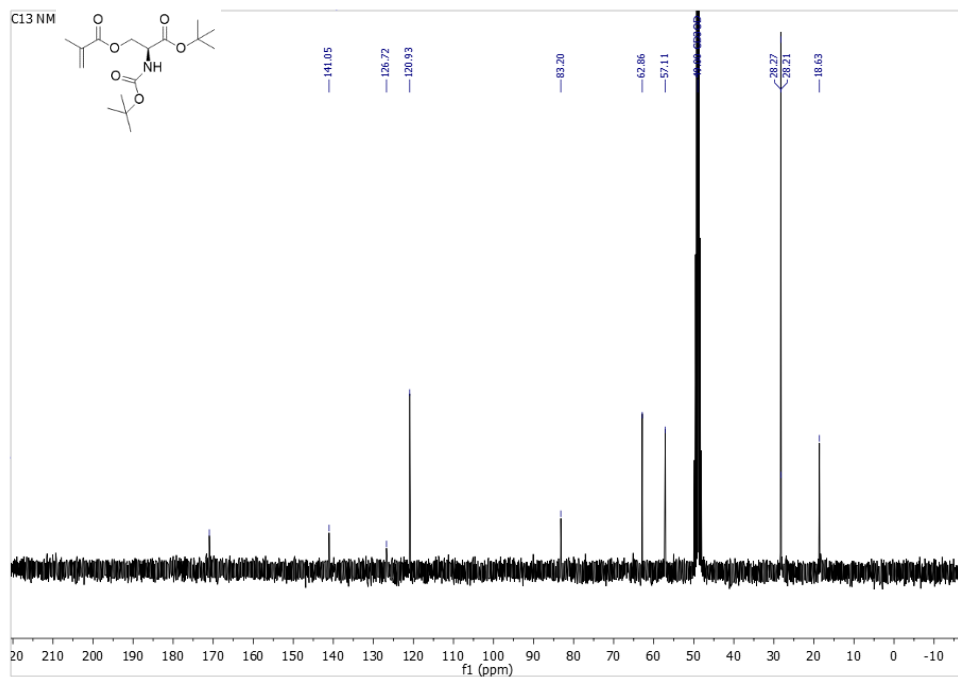

Figure S4: <sup>13</sup>C NMR of Compound 6

(3) (*S*)-2-amino-3-(*tert*-butoxy)-3-oxopropyl methacrylate •TFA

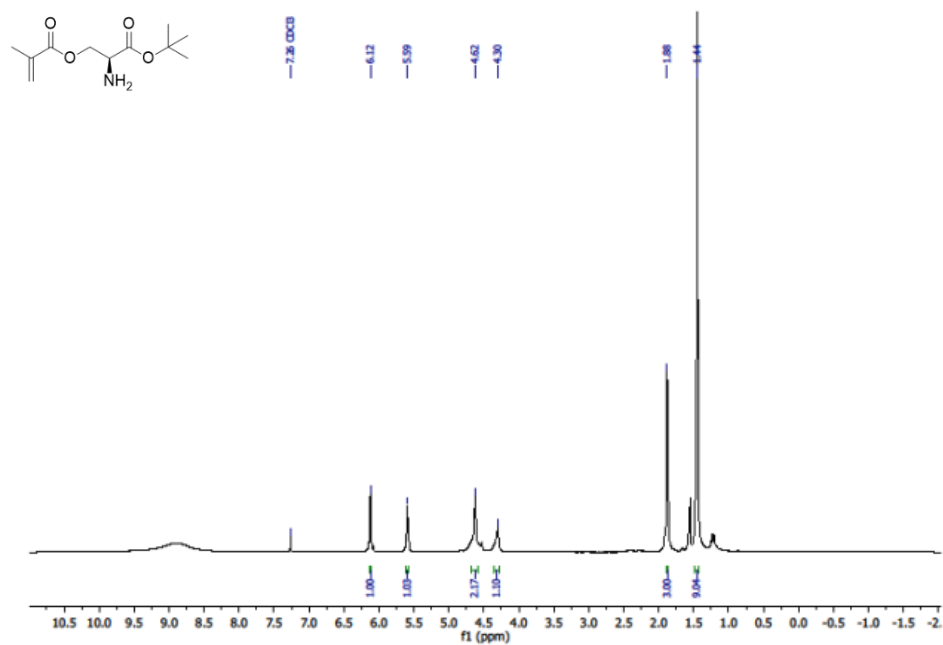

Figure S5:  $^1\text{H}$  NMR of Compound 3

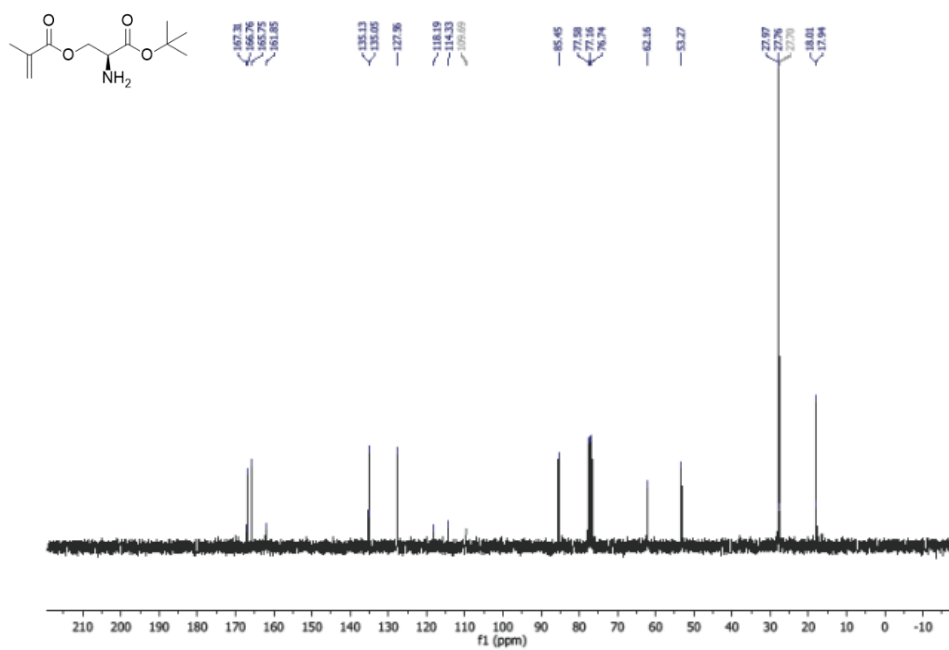

Figure S6:  $^{13}\text{C}$  NMR of Compound 3

(4) *N*-(*tert*-butoxycarbonyl)-*O*-methacryloyl-*L*-serine

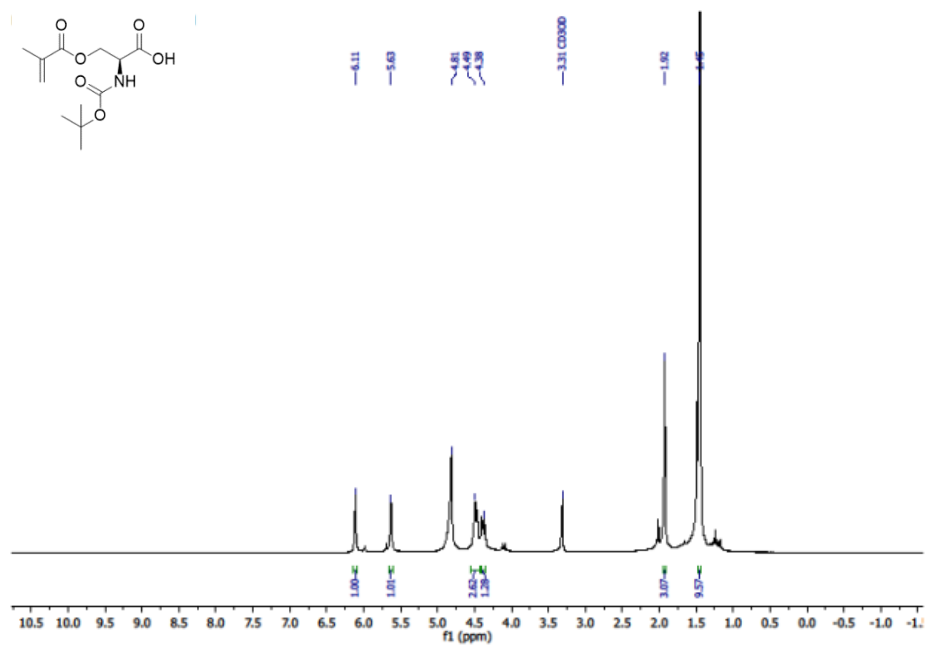

Figure S7: <sup>1</sup>H NMR of Compound 4

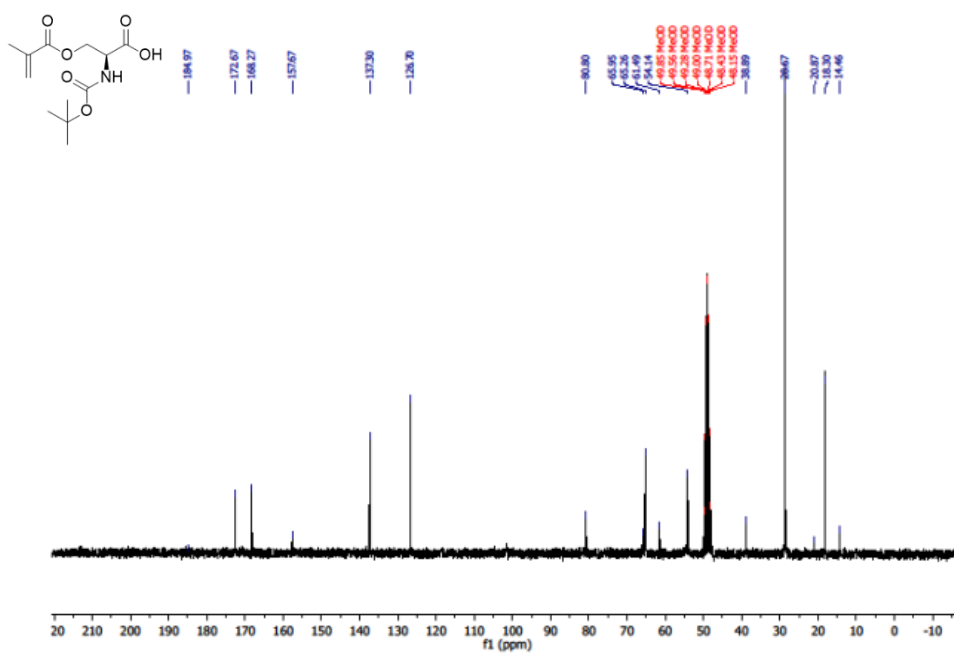

Figure S8: <sup>13</sup>C NMR of compound 4

(7) 3-(*tert*-butoxy)-2-((*S*)-2-((*tert*-butoxycarbonyl)amino)-3-(methacryloyloxy)propanamido)-3-oxopropyl methacrylate

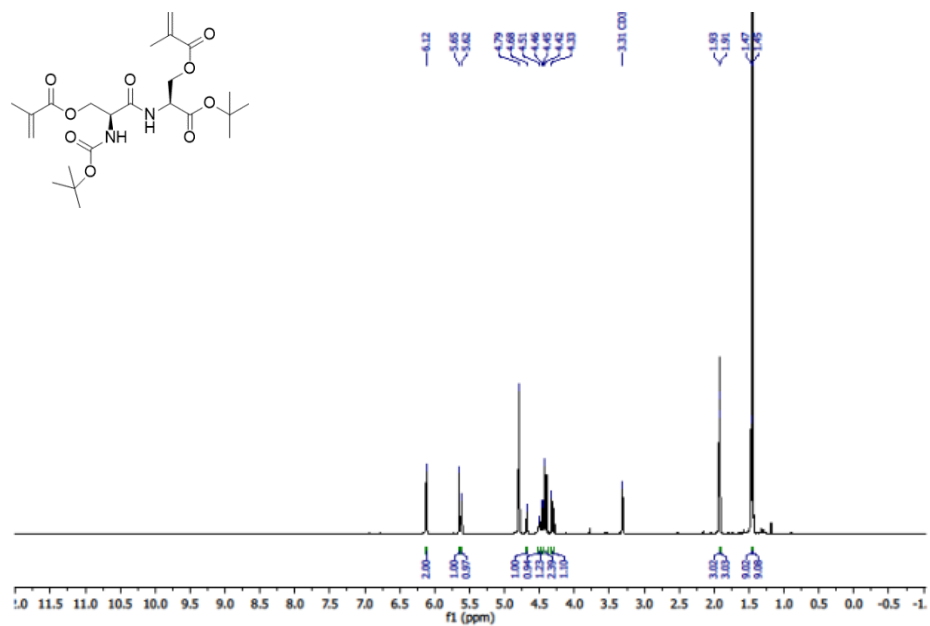

Figure S9:  $^1\text{H}$  NMR of compound 7

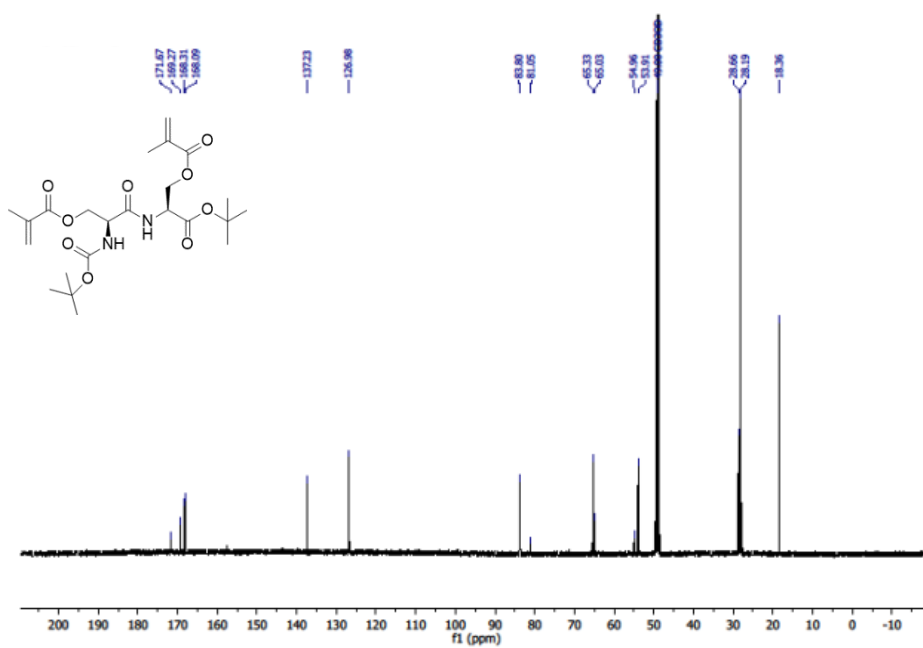

Figure S10:  $^{13}\text{C}$  NMR of compound 7

(1) *O*-methacryloyl-*N*-(*O*-methacryloyl-*L*-seryl)-*L*-serine • TFA

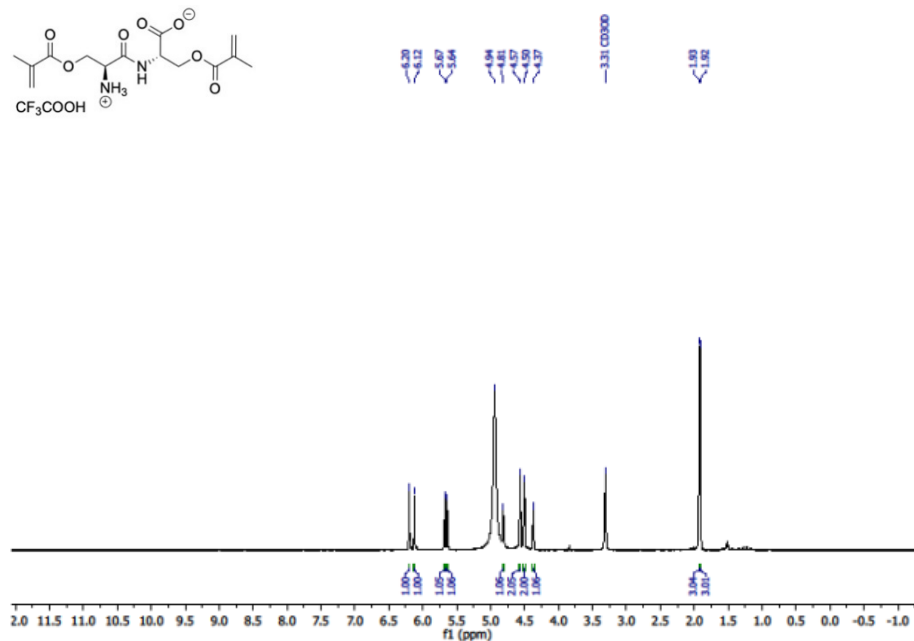

Figure S11: <sup>1</sup>H NMR of title compound zwitterionic cross-linker **1** as TFA salt

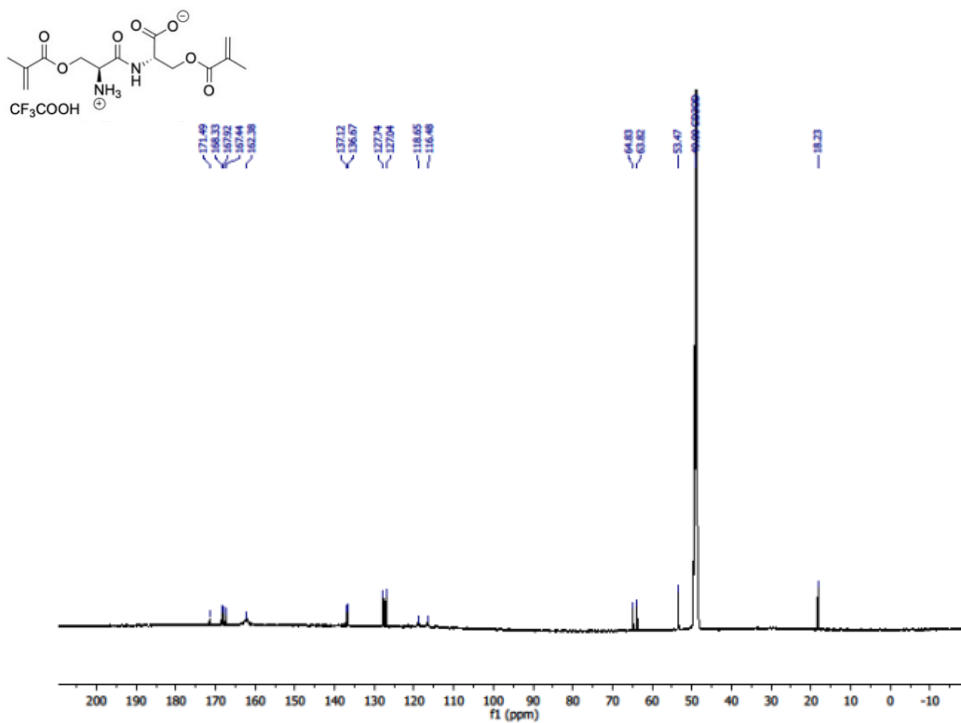

Figure S12: <sup>13</sup>C NMR of zwitterionic cross-linker **1** as TFA salt.

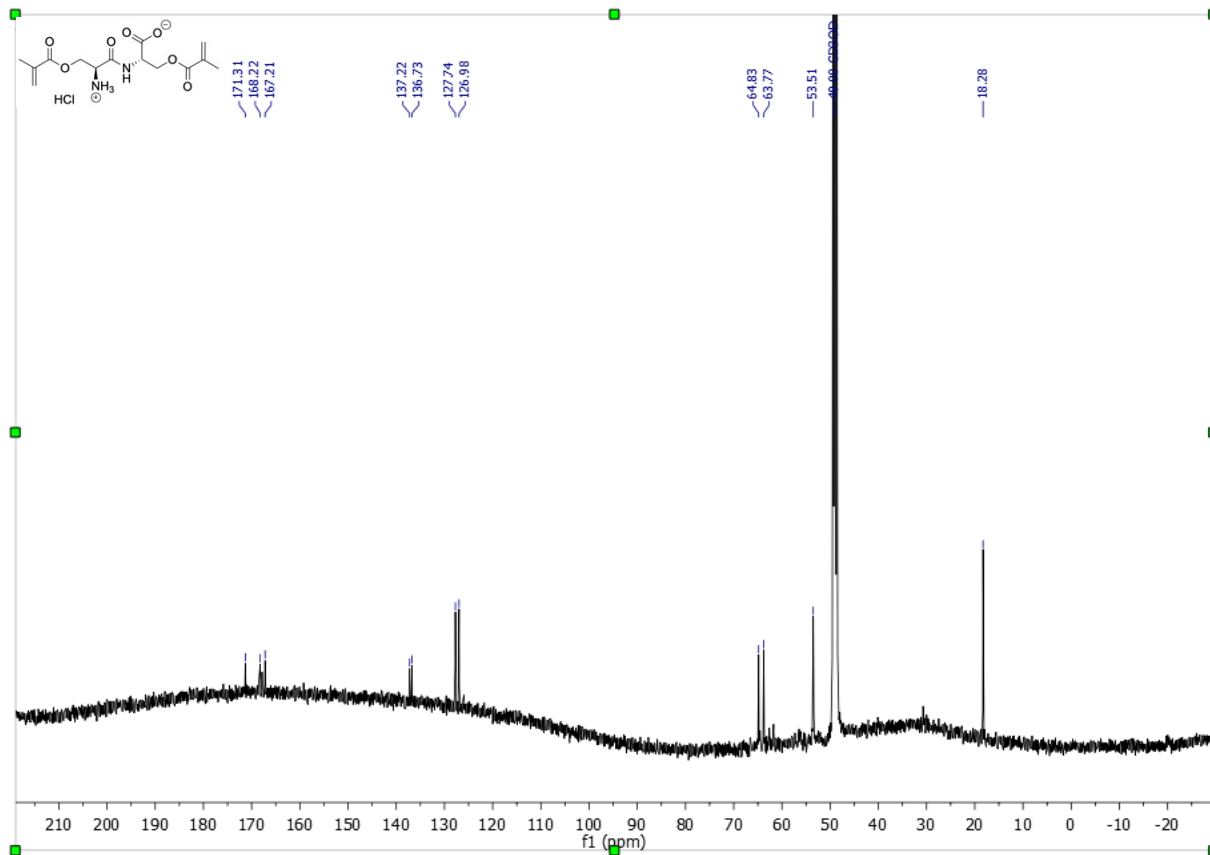

Figure S13:  $^{13}\text{C}$  NMR of zwitterionic crosslinker **1** as HCl salt.



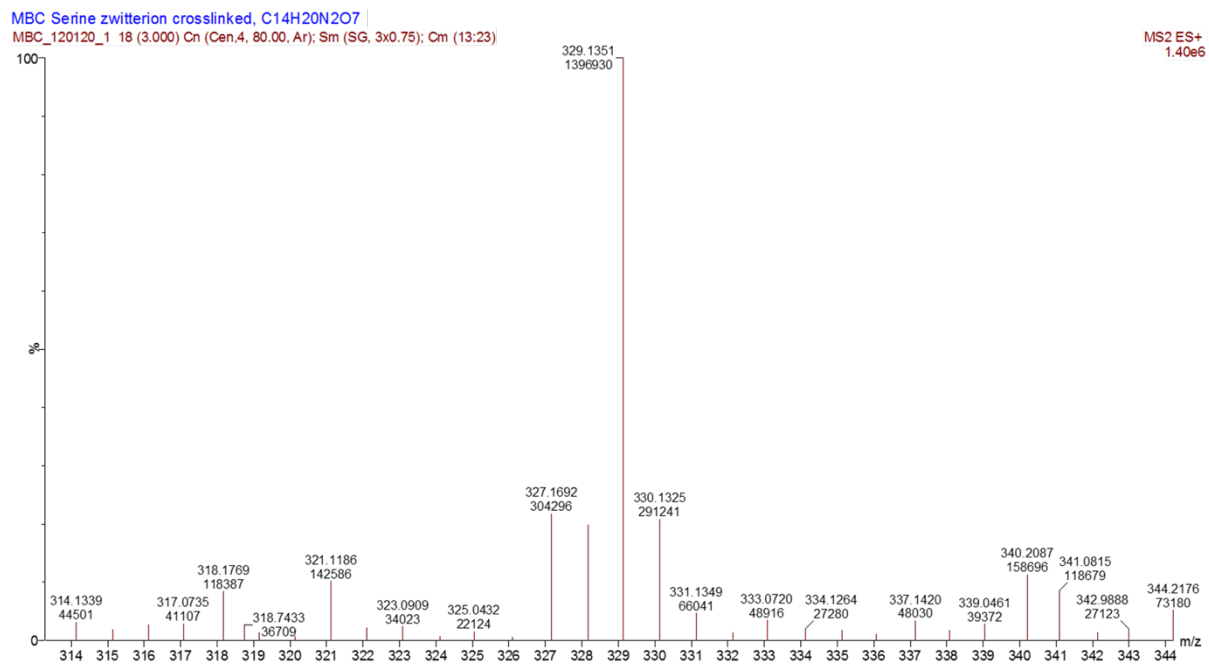

Figure S14: HRMS-ESI of the zwitterionic cross-linker (**1**). C<sub>14</sub>H<sub>20</sub>N<sub>2</sub>O<sub>7</sub> Calculated as 329.13; found 329.1351.
